1       **Innate visual attraction in wood ants is a hardwired behaviour seen across**  
2                               **different motivational and ecological contexts**

3  
4  
5  
6  
7  
8

Cornelia Buehlmann & Paul Graham  
School of Life Sciences, University of Sussex, Brighton, BN1 9QG, UK

Corresponding author: [cornelia.buehlmann@gmail.com](mailto:cornelia.buehlmann@gmail.com)

9       **ABSTRACT**

10           Ants are expert navigators combining innate and learnt navigational strategies. Whereas we  
11 know that the ants' feeding state segregates visual navigational memories in ants navigating along a  
12 learnt route, it is an open question if the motivational state also affects the ants' innate visual  
13 preferences. Wood ant foragers show an innate attraction to conspicuous visual cues. These foragers  
14 inhabit cluttered woodland habitat and feed on honeydew from aphids on trees, hence, the attraction to  
15 'tree-like' objects might be an ecologically relevant behaviour that is tailored to the wood ants'  
16 foraging ecology. Foragers from other ant species with different foraging ecologies show very  
17 different innate attractions. We investigated here the innate visual response of wood ant foragers with  
18 different motivational states, i.e. unfed or fed, as well as males that have a short life span and show no  
19 foraging activity. Our results show that ants from all three groups orient towards a prominent visual  
20 cue, i.e. the wood ants' innate visual attraction is not context dependent, but a hardwired behaviour  
21 seen across different motivational and ecological contexts.

22

23       **KEY WORDS**

24       Visual orientation, innate behaviour, navigation, foraging ecology, wood ants, *Formica rufa*

25  
26  
27  
28  
29  
30  
31  
32  
33  
34  
35  
36

## 37 INTRODUCTION

38           Ants cleverly combine innate and learnt navigational strategies to travel between their nest  
39 and feeding sites [1, 2]. Innate strategies such as path integration (e.g. [3, 4]), pheromone trails (e.g.  
40 [5]), attractive food odours [6], or innately attractive visual cues (e.g. [7, 8]) are key when unfamiliar  
41 with an environment. These innate responses can structure the ants' paths, hence, act as a scaffold and  
42 facilitate the learning of information relevant for navigation. Wood ant foragers show an innate  
43 attraction to large and conspicuous objects [7, 9-11]. These foragers feed on honeydew from aphids  
44 on trees [12], hence, the attraction to 'tree-like' objects might be an ecologically relevant behaviour  
45 that is tailored to the wood ants' foraging ecology [13]. Foragers from other ant species with different  
46 foraging ecologies show innate attractions different to wood ants (e.g. [8, 14]). Furthermore,  
47 behavioural experiments in *Drosophila* have shown that both flying and walking fruit flies show  
48 innate visual responses tuned to the flies' behaviour requirements [15, 16], with small objects being  
49 aversive and large thin objects being attractive. Aversive behaviour towards small objects potentially  
50 helps flies to avoid collision with other flying insects or predators, whereas bar-like objects may  
51 represent attractive feeding sites. Olfactory and visual information is commonly used to localize a  
52 food source, hence, the question arises if olfactory and visual responses vary with feeding state.  
53 Indeed, behavioural experiments in fruit flies and parasitotic wasps have revealed that the animals'  
54 feeding state can modulate innate olfactory and/or visual responses [17, 18].

55           Experienced foragers can also learn visual information for navigation [19-21] and, we know  
56 that motivational state (i.e. fed vs unfed) plays an important role in organizing visual navigational  
57 memories, allowing for different behaviours in fed and unfed ant foragers [22, 23]. More specifically,  
58 visual memories are primed by the ants' feeding state and this controls the choice between foodward  
59 and homeward route memories [22].

60           We investigate here if the innate visual response seen in wood ant foragers is also a context  
61 dependent behaviour tuned to foraging ecology. To do so, we recorded the innate visual response of  
62 wood ant foragers with different motivational states, i.e. unfed or fed, as well as males that have a short  
63 life span and show no foraging activity [24]. We found that ants from all three groups orient towards the  
64 visual cue, i.e. the wood ants' innate visual attraction is not flexible, but a hardwired behaviour seen  
65 across different motivational and ecological contexts.

66

## 67 METHODS

### 68 Ants

69           Experiments were performed with laboratory kept wood ants *Formica rufa* L. collected from  
70 Ashdown forest, East Sussex, UK. Ants were kept in the laboratory under a 12 h light: 12 h darkness  
71 cycle at 25-27° C. Ants were fed *ad libitum* with sucrose, dead crickets and water. During the  
72 experiments, food was limited to a minimum to increase the ants' foraging motivation, but water was  
73 permanently available.

74 We recorded the innate visual response from naïve wood ants from three different groups:  
75 unfed female foragers, fed female foragers and unfed males. To get fed foragers, foragers were fed  
76 with sucrose before the behavioural recording. We only recorded males that walked on the platform.  
77 Males are winged, however, they are not good flyers, i.e. most of the released males walked.

### 78 **Experimental setup**

79 Ants from these three groups were released in the centre of a circular platform (120 cm in  
80 diameter) surrounded by a cylinder (diameter 3 m, height 1.8 m) with white walls (Figure 1A). A 20°  
81 wide black rectangle (height: 90 cm, width: 52 cm) was placed on the inner wall of the surrounding  
82 cylinder. As a control, additional ants from the three groups were recorded when the visual cue was  
83 absent. Ants were only recorded once. To remove possible olfactory traces, the surface of the platform  
84 was covered with white paper which was rotated between recordings. Further, the visual cue was  
85 rotated between recordings to avoid the use of cues other than the black rectangle. The centre of the  
86 platform consisted of a cylindrical holding chamber of 6.5 cm diameter, which was remotely lowered  
87 to release the ant onto the platform. The ants' position was recorded every 20 ms using a tracking  
88 video camera (Trackit, SciTrackS GmbH). Paths were analysed in Matlab with similar analyses as  
89 done previously [11].

90

### 91 **RESULTS**

92 Paths from unfed female foragers, fed female foragers and unfed males that show no foraging  
93 activity were recorded in the behavioural arena in the presence of a conspicuous visual object (Figure  
94 1A). Ants from all three groups were directed (Rayleigh test; all  $p \ll 0.001$ ) and the ants walked  
95 towards the visual cue (Figure 1B). The 95% CI for the ants' final headings overlaid with the visual  
96 cue and the groups did not differ from each other (Watson Williams tests; all  $p > 0.05$ ). Whereas ants  
97 from all three groups approached the visual cue (Figure 1B), we observed differences in the ants'  
98 walking speed (Figure 2Ai) and path straightness (Figure 2Aii). Males walked significantly faster and  
99 straighter than fed and unfed foragers. Unfed and fed foragers differed in their walking speed but not  
100 in the path straightness (Figure 2).

101 In the absence of the visual cue (Figure 1C), unfed foragers were not directed (Rayleigh test;  
102  $p > 0.05$ ), whereas the other two groups were directed (Rayleigh test; males,  $p < 0.01$ ; fed foragers,  $p$   
103  $< 0.05$ ) but showed a very large spread in directions. Males walked significantly faster and straighter  
104 than fed and unfed foragers (Figure 2B). Unfed and fed foragers did not differ from each other.

105

### 106 **DISCUSSION**

107 Conspicuous objects initiate innate behaviour in many insects, including ants (fruit flies: [25-  
108 27], locusts: [28], ladybirds: [29], mantids: [30], leaf hoppers: [31], ants: [7-11, 14]), with many of  
109 these innate behaviours being ecologically tuned (e.g. prey detection, predator avoidance or landing  
110 site detection). Similarly, innate visual responses of different ant species are tailored to the ants'

111 habitat. Whereas wood ant foragers are attracted to large conspicuous objects [7, 9-11], desert ants  
112 avoid them [8, 14]. Wood ants (*Formica rufa*) inhabit cluttered woodland habitat where they  
113 predominantly feed on honeydew from aphids on trees [12]. *Cataglyphis fortis* desert ants forage on  
114 dead arthropods that are unpredictably distributed on the ground in the food-scarce terrain of the  
115 Saharan salt pans [6]. *C. fortis* avoid large objects such as bushes, potentially to avoid predators.  
116 Hence, the differences in the innate bias of wood and desert ant foragers make sense from an  
117 ecological point of view and seems to be tuned to their foraging ecology. What we do not know,  
118 however, is whether these innate visual responses vary with an ants' motivational state or caste. To  
119 test this, we recorded the innate visual behaviour of unfed foragers, fed foragers and males that have a  
120 short life span and show no foraging activity. We show here that the innate visual attraction to  
121 conspicuous objects in wood ants is not a context dependent behaviour, but a hardwired sensori-motor  
122 behaviour seen across different motivational and ecological contexts. It is possible that males are  
123 attracted to conspicuous objects in order to gain elevation to assist in dispersal. However, any role in  
124 innate visual orientation that assists in foraging would expect to be modulated by the ants'  
125 motivational state.

126         There are several examples of flexible innate behaviours in insects. For example, it was  
127 shown in parasitoid wasps that the insects' individual feeding state controls their innate behaviour  
128 [18]. Unfed wasps are attracted by flower odours and yellow targets that indicate food while fed  
129 wasps are attracted to host odours and are not attracted by yellow colours [18]. Furthermore,  
130 experiments with hawkmoths have shown that the moths' innate colour preference depends on  
131 ambient light conditions [32]. These moths are crepuscular and their colour preferences are tuned to  
132 illuminance and background. This flexible behaviour allows them to successfully forage under  
133 different light conditions. These examples show that insects are equipped with innate visual  
134 preferences, but they maintain necessary behavioural flexibility and behaviour is tuned to foraging  
135 ecology.

136         Given that there are many examples of flexibility, there is the question why wood ants do not  
137 show any flexibility in their innate visual orientation. Perhaps, ant foragers rely on their multimodal  
138 navigation toolkit to overcome potential problems with an inflexible innate visual reflex. Fed foragers  
139 will have path integration information and odour cues and visual information [1] as they attempt to  
140 return to their nest and these sources of orientation information may be essential in overcoming innate  
141 visual attractions that may otherwise disrupt a homeward journey.

142

#### 143 **FUNDING**

144         This work was supported by the Biotechnology and Biological Sciences Research Council  
145 (grant number: BB/R005036/1).

146

#### 147 **DATA ACCESSIBILITY**

148 The dataset generated during this study is available from the University of Sussex research  
149 repository (hosted by Figshare) [33]: <https://doi.org/10.25377/sussex.14270330>.

150

### 151 AUTHORS' CONTRIBUTIONS

152 CB and PG conceived the study. CB performed the experiments, analysed the data, and  
153 drafted the manuscript. PG revised the manuscript. Both authors have approved and agree to be  
154 accountable for all content of the manuscript.

155

### 156 FIGURES

157

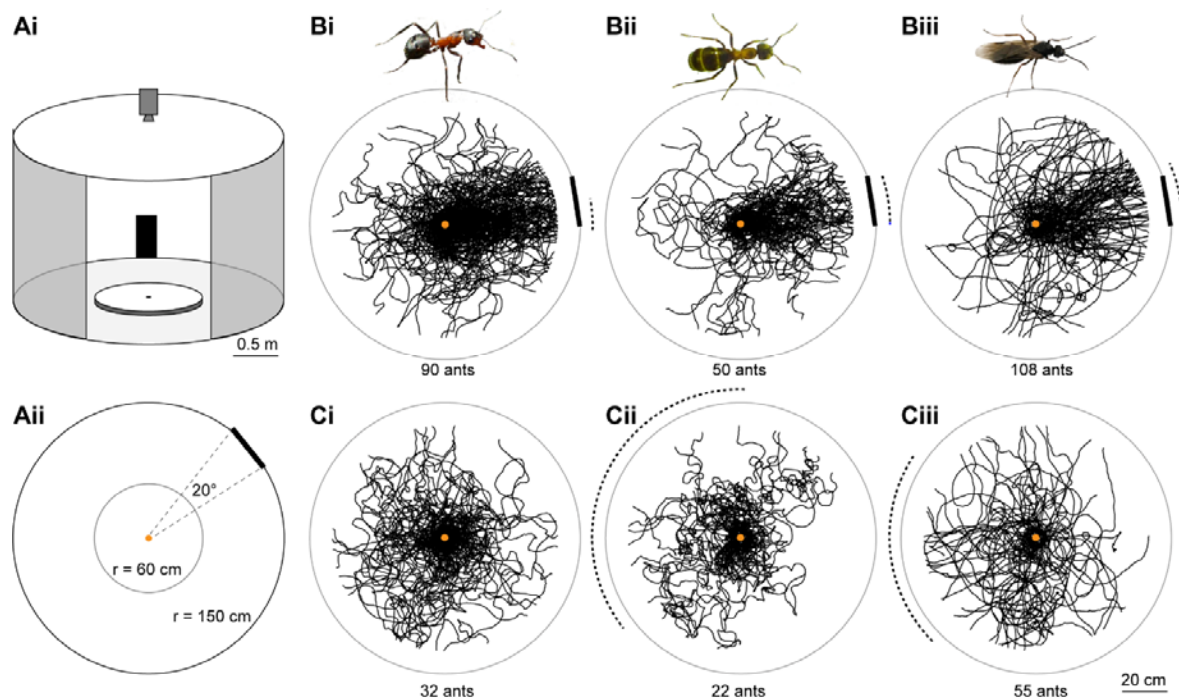

158

159 **Figure 1: Innate visual attraction in wood ants is seen across different motivational and**  
160 **ecological contexts. (Ai)** The experimental arena in which naïve ants were recorded. Circular white

161 platform (radius: 60 cm) is located in the centre of a cylinder (radius: 1.5 m, height: 1.8 m). A 20°

162 wide black rectangle (height: 90 cm, width: 52 cm) is mounted at the inner wall of the surrounding

163 cylinder. A camera recorded the ants' paths from above. A small door permitted access to the arena

164 shown here open and larger for clarity. (Aii) A top-down view of the arena shown in Ai. (B)

165 Paths of ants released at the centre of the arena in the presence of the visual cue are shown as black lines. If the

166 data is directed, dotted arcs show 95% confidence intervals (CIs) of the heading directions. The visual

167 cue is shown at the platform edge instead of on the cylinder wall. Bi: unfed female foragers; Bii: fed

168 female foragers; Biii: unfed males. (C) As in B but ants were recorded without the visual cue.

169

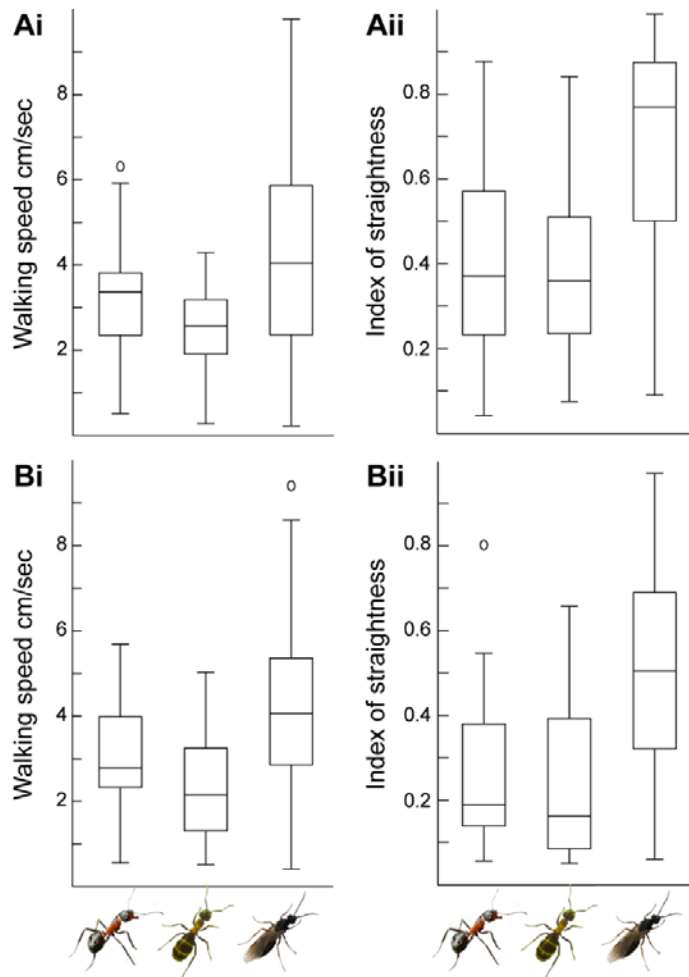

170

171 **Figure 2: Walking speed and path straightness of ants with different motivational and**  
172 **ecological contexts. (A) Path characteristics in the presence of the visual cue. Unfed, n = 90 ants; fed,**  
173 **n = 50 ants; males, n = 108 ants. (Ai) Walking speed of ants differed significantly between the three**  
174 **groups (left: unfed foragers; middle: fed foragers; right: males). Kruskal Wallis with Mann Whitney**  
175 **test and Bonferroni correction; unfed vs fed,  $p < 0.001$ ; unfed vs males,  $p < 0.05$ ; fed vs males,  $p <$**   
176  **$0.001$ . (Aii) Path straightness of males was significantly higher than of fed and unfed foragers**  
177 **(Kruskal Wallis with Mann Whitney test and Bonferroni correction; unfed vs males,  $p < 0.001$ ; fed vs**  
178 **males,  $p < 0.001$ ). There was no difference between the paths of fed and unfed foragers (Kruskal**  
179 **Wallis with Mann Whitney test and Bonferroni correction; unfed vs fed,  $p > 0.05$ ). (B) Path**  
180 **characteristics in the absence of the visual cue. Unfed, n = 32 ants; fed, n = 22 ants; males, n = 55**  
181 **ants. (Bi) Walking speed of males was significantly higher than observed in unfed and fed foragers**  
182 **but the latter two groups did not differ from each other. Kruskal Wallis with Mann Whitney test and**  
183 **Bonferroni correction; unfed vs fed,  $p > 0.05$ ; unfed vs males,  $p < 0.01$ ; fed vs males,  $p < 0.001$ . (Bii)**  
184 **Path straightness of males was significantly higher than of fed and unfed foragers (Kruskal Wallis**  
185 **with Mann Whitney test and Bonferroni correction; unfed vs males,  $p < 0.001$ ; fed vs males,  $p <$**   
186  **$0.001$ ). There was no difference between the paths of fed and unfed foragers (Kruskal Wallis with**

187 Mann Whitney test and Bonferroni correction; unfed vs fed,  $p > 0.05$ ). Boxplots: median, 25th and  
188 75th percentiles (edges of the boxes) and whiskers for extreme values not considered as outliers  
189 (circles).

190

## 191 REFERENCES

- 192 1. Buehlmann, C., Mangan, M., and Graham, P. (2020). Multimodal interactions in insect navigation.  
193 *Anim. Cogn.* *23*, 1129–1141.
- 194 2. Knaden, M., and Graham, P. (2016). The Sensory Ecology of Ant Navigation: From Natural  
195 Environments to Neural Mechanisms. *Annu. Rev. Entomol.* *61*, 63-76.
- 196 3. Collett, T.S., Collett, M., and Wehner, R. (2001). The guidance of desert ants by extended landmarks.  
197 *J. Exp. Biol.* *204*, 1635-1639.
- 198 4. Mueller, M., and Wehner, R. (2010). Path Integration Provides a Scaffold for Landmark Learning in  
199 Desert Ants. *Curr. Biol.* *20*, 1368-1371.
- 200 5. Harrison, J.F., Fewell, J.H., Stiller, T.M., and Breed, M.D. (1989). Effects of experience on use of  
201 orientation cues in the giant tropical ant *Anim. Behav.* *37*, 869-871.
- 202 6. Buehlmann, C., Graham, P., Hansson, B.S., and Knaden, M. (2014). Desert ants locate food by  
203 combining high sensitivity to food odors with extensive crosswind runs. *Curr. Biol.* *24*, 960-964.
- 204 7. Graham, P., Fauria, K., and Collett, T.S. (2003). The influence of beacon-aiming on the routes of wood  
205 ants. *J. Exp. Biol.* *206*, 535-541.
- 206 8. Collett, M. (2010). How desert ants use a visual landmark for guidance along a habitual route. *Proc.*  
207 *Natl. Acad. Sci. U. S. A.* *107*, 11638-11643.
- 208 9. Voss, C. (1967). Über das Formensehen der roten Waldameise (*Formica rufa* Gruppe). *Zeitschrift Fur*  
209 *Vergleichende Physiologie* *55*, 225-254.
- 210 10. Buehlmann, C., Aussel, A., and Graham, P. (2020). Dynamic multimodal interactions in navigating  
211 wood ants: What do path details tell us about cue integration? *J. Exp. Biol.* *223*, jeb221036.
- 212 11. Buehlmann, C., Wozniak, B., Goulard, R., Webb, B., Graham, P., and Niven, J. (2020). Mushroom  
213 bodies are required for learnt visual navigation but not for innate visual behaviour in ants. *Curr. Biol.*  
214 *30*, 3438-3443.
- 215 12. Domisch, T., Risch, A.C., and Robson, E.J.H. (2016). Wood ant foraging and mutualism with  
216 aphids. In *Wood Ant Ecology and Conservation*, J. Stockan, & Robinson, E. (Eds.), ed. (Cambridge:  
217 Cambridge University Press).
- 218 13. Graham, P., and Wystrach, A. (2016). The Emergence of Spatial Cognition in Insects. In: Olmstead  
219 Mary C. (ed) *Animal Cognition: Principles, Evolution, and Development*
- 220 14. Heusser, D., and Wehner, R. (2002). The visual centring response in desert ants, *Cataglyphis fortis*. *J.*  
221 *Exp. Biol.* *205*, 585-590.
- 222 15. Maimon, G., Straw, A.D., and Dickinson, M.H. (2008). A simple vision-based algorithm for decision  
223 making in flying *Drosophila*. *Curr. Biol.* *18*, 464-470.
- 224 16. Grabowska, M.J., Steeves, J., Alpay, J., Van De Poll, M., Ertekin, D., and van Swinderen, B. (2018).  
225 Innate visual preferences and behavioral flexibility in *Drosophila*. *J. Exp. Biol.* *221*, jeb185918.
- 226 17. Vogt, K., Zimmerman, D.M., Schlichting, M., Hernandez-Nunez, L., Qin, S., Malacon, K., Rosbash,  
227 M., Pehlevan, C., Cardona, A., and Samuel, A.D.T. (2021). Internal state configures olfactory behavior  
228 and early sensory processing in *Drosophila* larvae. *Nature* *7*, eabd6900.
- 229 18. Waeckers, F.L. (1994). The effect of food deprivation on the innate visual and olfactory preferences in  
230 the parasitoid *Cotesia rubecula* *J. Insect Physiol.* *40*, 641-649.
- 231 19. Zeil, J. (2012). Visual homing: an insect perspective. *Curr. Opin. Neurobiol.* *22*, 285-293.
- 232 20. Wehner, R., Cheng, K., and Cruse, H. (2014). *Visual Navigation Strategies in Insects: Lessons from*  
233 *Desert Ants*, (Cambridge: MA: MIT Press).
- 234 21. Graham, P., and Philippides, A. (2017). Vision for navigation: What can we learn from ants?  
235 *Arthropod Structure & Development* *46*, 718-722.
- 236 22. Harris, R.A., de Ibarra, N.H., Graham, P., and Collett, T.S. (2005). Ant navigation - Priming of visual  
237 route memories. *Nature* *438*, 302-302.
- 238 23. Wehner, R., Boyer, M., Loertscher, F., Sommer, S., and Menzi, U. (2006). Ant navigation: One-way  
239 routes rather than maps. *Curr. Biol.* *16*, 75-79.
- 240 24. Hoelldobler, B., and Wilson, E.O. (1990). *The Ants*, (Cambridge, Massachusetts: Belknap Press of  
241 Harvard University Press).
- 242 25. Wehner, R. (1972). Spontaneous pattern preferences of *Drosophila melanogaster* to black areas in  
243 various parts of the visual field. *J. Insect Physiol.* *18*, 1531–1543.

- 244 26. Gotz, K.G. (1987). Course-control, metabolism and wing interference during ultralong tethered flight  
245 in *Drosophila melanogaster*. *J. Exp. Biol.* *128*, 35-46.
- 246 27. Strauss, R., and Pichler, J. (1998). Persistence of orientation toward a temporarily invisible landmark in  
247 *Drosophila melanogaster*. *Journal of Comparative Physiology A* *182*, 411-423.
- 248 28. Wallace, G.K. (1962). Experiments on visually controlled orientation in the desert locust, *Schistocerca*  
249 *gregaria* (Forskål). *Anim. Behav.* *10*, 361-369.
- 250 29. Collett, T. (1988). How ladybirds approach nearby stalks: a study of visual selectivity and attention.  
251 *Journal of Comparative Physiology A* *163*, 355-363.
- 252 30. Poteser, M., and Kral, K. (1995). Visual distance discrimination between stationary targets in praying  
253 mantids: an index of the use of motion parallax. *J. Exp. Biol.* *189*, 2127-2137.
- 254 31. Brackenbury, J. (1996). Targetting and optomotor space in the leaf-hopper *Empoasca vitis* (Gothé)  
255 (Hemiptera: Cicadellidae). *J. Exp. Biol.* *199*, 731-740.
- 256 32. Kuenzinger, W., Kelber, A., Weesner, J., Travis, J., Raguso, R.A., and Goyret, J. (2019). Innate colour  
257 preferences of a hawkmoth depend on visual context. *Biol. Lett.* *15*, 20180886.
- 258 33. Buehlmann, C., and Graham, P. (2021). Data from: Innate visual attraction in wood ants is a hardwired  
259 behaviour seen across different motivational and ecological contexts. University of Sussex research  
260 repository (hosted by Figshare). (doi: <https://doi.org/10.25377/sussex.14270330>).
- 261
- 262
